# Supplementary material for: Design strategy for an analyte-compensated fluorescent probe to reduce its toxicity
Source: Royal Society of Chemistry journal article supplement (doi:10.1039/d2cc02789e), 2022-01-01
Supplement: d2cc02789e1.pdf [file d2cc02789e1.pdf]

# ELECTRONIC SUPPLEMENTARY INFORMATION

## Design strategy for analyte-compensated fluorescent probe to reduce the toxicity

Jinlong Zhang<sup>a</sup>, Shuai Mu<sup>a</sup>, Weilin Wang<sup>b</sup>, Huipeng Sun<sup>a</sup>, Shuangqin Li<sup>a</sup>, Xuezhao Shi<sup>a</sup>, Yunbo

Liu, Xiaoyan Liu<sup>a</sup>, Haixia Zhang<sup>a\*</sup>

<sup>a</sup> State Key Laboratory of Applied Organic Chemistry, Key Laboratory of Nonferrous Metals Chemistry and Resources Utilization of Gansu Province and College of Chemistry and Chemical Engineering, Lanzhou University, Lanzhou 730000, China.

<sup>b</sup> School of Pharmacy, Lanzhou University, Lanzhou 730000, China

### Contents:

|                                                                                         |    |
|-----------------------------------------------------------------------------------------|----|
| 1. Materials and General Methods.....                                                   | 2  |
| 1.1. Reagents and instruments .....                                                     | 2  |
| 1.2. Synthesis .....                                                                    | 2  |
| 1.3. Spectrometric Study.....                                                           | 4  |
| 1.4. Imaging experiments .....                                                          | 4  |
| 1.5. Detection of H <sub>2</sub> S Released .....                                       | 5  |
| 1.6. Assessment of Liver Fibrosis.....                                                  | 5  |
| 1.7. Toxicity.....                                                                      | 6  |
| 2. Structure Characterizations .....                                                    | 6  |
| 3. Spectral Supplementary Data of NP-SN <sub>3</sub> and NP-N <sub>3</sub> .....        | 15 |
| 4. In Vitro, Cellular and Zebrafish Imaging Data of NP-N <sub>3</sub> .....             | 16 |
| 5. Detection of H <sub>2</sub> S Released by Probes in Vitro, Cells and Zebrafish ..... | 19 |
| 6. Cytotoxicity Assay .....                                                             | 20 |
| 7. Quantitative Standard Curve.....                                                     | 21 |
| 8. Comparison with the Existing H <sub>2</sub> S Sensor.....                            | 22 |
| 9. The examinations of blood and urine routine in rats .....                            | 22 |

---

\* Corresponding author Tel: +86-931-8912510; fax: +86-931-8912582;

E-mail: [zhanghx@lzu.edu.cn](mailto:zhanghx@lzu.edu.cn)

# 1. Materials and General Methods

## 1.1. Reagents and instruments

All reagents used in the experiment are of analytical grade unless otherwise stated and no further purification is required. All reagents were purchased from legal commercial sources. The NMR spectra were measured using Liquid Nuclear Magnetic Resonance Spectrometer JNM-ECS 400 M (Japan). The fluorescence emission spectra were recorded on a fluorescence spectrometer RF-5301pc (Japan). The absorption spectra were measured on an ultraviolet-visible spectrophotometer TU-1810 (China). A Bruker Daltonics APEX II FT-ICR spectrometer (USA) with ESI mode was used to measure high-resolution mass spectra. The digital pH meter PHSJ-3F (China) was used to measure the pH value. A confocal laser scanning microscope Axio Imager.Z2 (Germany) with objective lens ( $\times 20$ ) was used to take fluorescence images of cells. Cell viability and cytokines were recorded by using a microplate reader Flash3001 (USA). BCA protein quantification kit,  $\alpha$ -SMA enzyme-linked immunoassay kit were purchased from J&L Biological (China). HepG2, HSC-T6 were provided by the Cell Bank of Shanghai Institute of Biochemistry and Cell Biology, Chinese Academy of Sciences. Zebrafish embryos were purchased from Nanjing Yishulihua Biotechnology Co. Ltd.

## 1.2. Synthesis

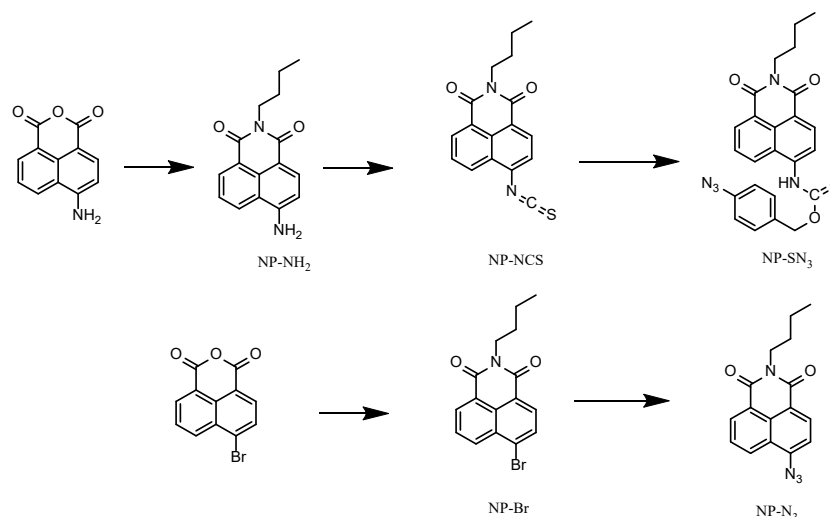

**Scheme S1** Synthetic Route to Probes

### 1.2.1. Synthesis of NP-NH<sub>2</sub>

4-Amino-1,8-naphthalenedicarboxylic anhydride (400 mg, 1.88 mmol) and 1-butylamine (411.7 mg, 3.01 mmol) were dissolved in ethanol (25 mL) in a round bottom flask under argon, heated to reflux for 4 hours, cooled to room temperature, evaporated under reduced pressure to remove the solvent, and purified by column chromatography to obtain the product. (hexane:ethyl acetate=7:3) <sup>1</sup>H NMR (400 MHz, DMSO-*d*<sub>6</sub>)  $\delta$  8.61 – 8.52 (m, 1H), 8.38 (d,  $J = 7.2$  Hz, 1H), 8.18 – 8.10 (m, 1H), 7.61

(d,  $J = 8.8$  Hz, 1H), 7.40 (s, 2H), 6.82 – 6.76 (m, 1H), 3.99 – 3.92 (m, 2H), 1.60 – 1.46 (m, 2H), 1.28 (s, 2H), 0.87 (d,  $J = 6.6$  Hz, 3H).  $^{13}\text{C}$  NMR (101 MHz, DMSO- $D_6$ )  $\delta$  164.28, 163.42, 153.21, 134.46, 131.50, 130.19, 129.79, 124.49, 122.32, 119.88, 108.67, 108.08, 40.24, 30.37, 20.37, 19.18, 14.29. HRMS (ESI)  $[\text{M}+\text{H}]^+$  calcd for  $\text{C}_{16}\text{H}_{17}\text{N}_2\text{O}_2$ , 269.1290, found, 269.1286.

### 1.2.2. Synthesis of NP-NCS

Thiophosgene dissolved in acetone (25 mL) was added dropwise to NP-NH<sub>2</sub> (286 mg, 1.02 mmol) in acetone (70 mL) over 30 min at 0 °C. The reaction mixture was stirred at room temperature overnight, then the solvent was evaporated under reduced pressure, and the product was purified by column chromatography.  $^1\text{H}$  NMR (400 MHz, Chloroform- $d$ )  $\delta$  8.58 (s, 1H), 8.46 (d,  $J = 8.0$  Hz, 1H), 8.36 (d,  $J = 8.8$  Hz, 1H), 7.82 – 7.76 (m, 1H), 7.57 (d,  $J = 9.7$  Hz, 1H), 4.12 (d,  $J = 2.2$  Hz, 2H), 1.65 (s, 2H), 1.47 – 1.36 (m, 2H), 0.94 (d,  $J = 8.3$  Hz, 3H).  $^{13}\text{C}$  NMR (101 MHz, Chloroform- $d$ )  $\delta$  164.02, 163.60, 143.38, 132.21, 131.69, 129.16, 128.73, 126.89, 124.36, 122.71, 119.01, 114.70, 65.65, 40.34, 30.29, 20.47, 13.94. HRMS (ESI)  $[\text{M}+\text{H}]^+$  calcd for  $\text{C}_{17}\text{H}_{15}\text{N}_2\text{O}_2\text{S}$ , 311.0854, found, 311.0863.

### 1.2.3. Synthesis of NP-Br

4-Bromo-1,8-naphthalenedicarboxylic anhydride (4.0 g, 14.43 mmol) was dissolved in ethanol (80 mL) and butylamine (1.005 g, 14.43 mmol) was added. The reaction mixture was stirred in refluxing ethanol for 24 hours. After cooling to room temperature, the mixture was filtered and dried under reduced pressure to give a yellow solid.  $^1\text{H}$  NMR (400 MHz, Chloroform- $d$ )  $\delta$  8.64 (d,  $J = 7.3$  Hz, 1H), 8.54 (d,  $J = 8.5$  Hz, 1H), 8.39 (d,  $J = 7.9$  Hz, 1H), 8.02 (d,  $J = 7.9$  Hz, 1H), 7.85 – 7.80 (m, 1H), 4.19 – 4.12 (m, 2H), 1.70 (p,  $J = 7.6$  Hz, 2H), 1.43 (h,  $J = 7.4$  Hz, 2H), 0.96 (t,  $J = 7.4$  Hz, 3H).  $^{13}\text{C}$  NMR (101 MHz, Chloroform- $d$ )  $\delta$  163.72, 163.70, 133.30, 132.09, 131.29, 131.17, 130.71, 130.27, 129.09, 128.16, 123.24, 122.38, 40.47, 30.25, 20.45, 13.93. HRMS (ESI)  $[\text{M}+\text{H}]^+$  calcd for  $\text{C}_{16}\text{H}_{15}\text{BrNO}_2$ , 332.0286, found, 332.0280.

### 1.2.4. Synthesis NP-SN<sub>3</sub>

NaH (40 mg, 60% in oil) was dissolved in 10 mL anhydrous THF, p-azidobenzyl alcohol (149 mg) was added to this solvent at 0 °C. The compound NP-NCS (310 mg) was dissolved in 10 mL THF and added dropwise to the mixture. The resultant mixture was stirred at 0 °C for 30 min, then stirred at r.t. until the completion of the reaction indicated by TLC. The reaction was quenched by adding brine and the reactant was extracted with ethyl acetate. The organic layers were combined, dried over MgSO<sub>4</sub>, and evaporated under vacuum. The crude product was purified by column chromatography to give a pale-yellow solid.  $^1\text{H}$  NMR (400 MHz, Chloroform- $d$ )  $\delta$  8.61 – 8.50 (m, 2H), 8.24 (d,  $J = 9.5$  Hz, 1H), 7.73 (s, 1H), 7.36 – 7.30 (m, 2H), 7.01 – 6.94 (m, 2H), 5.56 (s, 2H), 4.13 (d,  $J = 3.3$  Hz, 2H), 1.66 (d,  $J = 12.4$  Hz, 2H), 1.46 – 1.34 (m, 2H), 1.24 (s, 2H), 0.94 (d,  $J = 10.6$  Hz, 3H).  $^{13}\text{C}$  NMR (101 MHz, Chloroform- $d$ )  $\delta$  189.34, 163.99, 163.51, 140.73, 131.64, 131.39, 131.33, 130.37, 129.01, 127.77, 127.38, 126.21, 123.35, 120.98, 119.32, 99.99, 77.32, 73.19,

53.53, 40.40, 30.25, 29.78, 20.44, 13.90. HRMS (ESI)  $[M-H]^-$  calcd for  $C_{24}H_{20}N_5O_3S$ , 458.1281, found, 458.1305.

### 1.2.5. Synthesis of NP-N<sub>3</sub>

NP-Br (3.31 g, 10 mmol) and NaN<sub>3</sub> (0.65 g, 10 mmol) were dissolved in 50 mL of anhydrous DMF. After stirring the mixture at 80°C for 6 h, the solution was diluted with H<sub>2</sub>O and extracted with EtOAc. The organic phase was washed with water and brine, dried over Na<sub>2</sub>SO<sub>4</sub> and concentrated in vacuo. Purification by column chromatography gave a yellow solid. <sup>1</sup>H NMR (400 MHz, Chloroform-*d*) δ 8.61 – 8.56 (m, 1H), 8.52 (d, *J* = 9.6 Hz, 1H), 8.37 (d, *J* = 9.9 Hz, 1H), 7.69 (s, 1H), 7.41 (d, *J* = 10.8 Hz, 1H), 4.17 – 4.10 (m, 2H), 1.74 – 1.63 (m, 2H), 1.41 (d, *J* = 13.2 Hz, 2H), 0.95 (dd, *J* = 10.1, 6.2 Hz, 3H). <sup>13</sup>C NMR (101 MHz, Chloroform-*d*) δ 164.02, 163.60, 143.38, 132.21, 131.69, 129.16, 128.73, 126.89, 124.36, 122.71, 119.01, 114.70, 40.34, 30.29, 20.47, 13.94. HRMS (ESI)  $[M+Na]^+$  calcd for  $C_{16}H_{14}N_4NaO_2$ , 317.1042, found, 317.1065.

### 1.3. Spectrometric Study

The probe NP-SN<sub>3</sub> (or NP-N<sub>3</sub>) was dissolved in DMSO to obtain a 1.0 mM stock solution. Stock solutions (10.0 mM) of analytes, including metal ions (K<sup>+</sup>, Na<sup>+</sup>, Mg<sup>2+</sup>), anions (F<sup>-</sup>, Cl<sup>-</sup>, Br<sup>-</sup>, I<sup>-</sup>, NO<sub>3</sub><sup>-</sup>, SO<sub>3</sub><sup>2-</sup>, HSO<sub>3</sub><sup>-</sup>, SO<sub>4</sub><sup>2-</sup>, AcO<sup>-</sup>), amino acids (GSH (1.0 mM), Hcy, Cys, Thr, Gly), and active oxygen (ClO<sup>-</sup>, H<sub>2</sub>O<sub>2</sub>) were prepared by dissolving in phosphate-buffered saline (PBS). All spectrometric measurements were performed in DMSO/PBS (v/v = 4:1, pH = 7.4, 10 mM) at 37 °C with 10.0 μM of probe and 200 μM of analyte, unless otherwise specified. The fluorescence experiment was performed with the excitation and emission wavelengths 450/520 nm (slit width: 3 and 3 nm, respectively) and 1.0 cm Quartz cuvette.

### 1.4. Imaging experiments

#### 1.4.1. Fluorescence Imaging of H<sub>2</sub>S in Cells

HepG2 and HSC-T6 cells were grown in Dulbecco's modified Eagle's medium (DMEM) including 10% fetal bovine serum (FBS) and 1% antibiotics (streptomycin, Hyclone) at 37 °C in a humidified incubator which contained 5% CO<sub>2</sub> and 95% air.

The cytotoxicity of NP-SN<sub>3</sub> (or NP-N<sub>3</sub>) were investigated with Cell Counting Kit-8 (CCK-8). The cells were incubated for 12 h upon different concentrations (0, 2.5, 5.0, 10.0, 20.0, 25.0, and 50.0 μM) of the probes and CCK-8 (10%) solution was added into each well. Then, the plate was incubated further for 2 h before the measurement of the absorbance values of each well using a microplate reader at 450 nm with six sets for each concentration.

HepG2 cells were inoculated in confocal plates for 24 h, and washed with PBS three times after adherence. For the blank group, HepG2 cells were incubated with the probes at 37 °C for 0.5 h before imaging. For the exogenous H<sub>2</sub>S group, the cells were pretreated with 100 μM NaHS at 37 °C for 0.5 h and then operated as that as the blank group. For the endogenous H<sub>2</sub>S group, the cells were pretreated with 200 μM L-Cys at 37 °C for 1 h and then treated as that as the blank group. In the control group, cells

were pretreated with 1 mM DL-propargylglycine (PAG) for 1 h and with L-Cys (200  $\mu$ M) for 1 h at 37 °C in sequence, then treated as the way of blank group. The concentration of **probes** used for imaging of cell was 10  $\mu$ M.

#### **1.4.2. Fluorescence Imaging of H<sub>2</sub>S in Zebrafish**

Embryos were examined under a dissecting microscope and normally developing specimens were selected for further experiments as described in the literature (Kimmel, Ballard et al. 1995). Eligible zebrafish embryos were divided into three groups for bioimaging. In the first group, the probes were added to zebrafish larvae to incubate for 0.5 h. In the second group, the zebrafish larvae was pretreated with NaHS (100  $\mu$ M) for 0.5 h and then treated as the way for the first group. In the third group, zebrafish embryos were incubated with the probes and hatched into larvae at 28°C. The zebrafish embryos and the larvae from the three groups were imaged separately after washing with PBS. The concentration of two probes used for imaging of larvae and embryos was 10  $\mu$ M.

### **1.5. Detection of H<sub>2</sub>S Released**

#### **1.5.1. Detection of H<sub>2</sub>S Released by Probes *in vitro***

We chose the probe CySO<sub>3</sub>N<sub>3</sub> as another probe to detect hydrogen sulfide. In DMSO: PBS (v/v=4:1) solution, the probe NP-SN<sub>3</sub> (50  $\mu$ M) or NP-N<sub>3</sub> (50  $\mu$ M) was reacted with NaHS (50  $\mu$ M) for 1 h, and then the probe CySO<sub>3</sub>N<sub>3</sub> was added. The fluorescence emission intensities were recorded separately at different excitation wavelengths (450 nm and 675 nm).

#### **1.5.2. Detection of H<sub>2</sub>S Released by Probes in Cells**

HePG2 cells were divided into three groups. The first group only added probe CySO<sub>3</sub>N<sub>3</sub> as blank control. The second group added probe NP-N<sub>3</sub> and incubated for 1 h before adding probe CySO<sub>3</sub>N<sub>3</sub>. The third group added probe NP-SN<sub>3</sub> and incubated for 1 h before adding probe CySO<sub>3</sub>N<sub>3</sub>. All probe concentrations in imaging experiments were 10  $\mu$ M.

#### **1.5.3. Detection of H<sub>2</sub>S Released by Probes in Zebrafish**

Zebrafish larvae were divided into two groups. The first group added probe NP-N<sub>3</sub> and incubated for 1 h before adding probe CySO<sub>3</sub>N<sub>3</sub>. The second group added probe NP-SN<sub>3</sub> and incubated for 1 h before adding probe CySO<sub>3</sub>N<sub>3</sub>. All probe concentrations in imaging experiments were 10  $\mu$ M.

### **1.6. Assessment of Liver Fibrosis**

HSC-T6 cells were seeded in a twelve-well plate at a density of  $2.5 \times 10^4$  /mL and cultured for 24 h. The cells were divided into two groups, blank group and LPS group. For blank group, HSC-T6 cells were incubated with NP-SN<sub>3</sub> or NP-N<sub>3</sub> for 0.5 h at 37°C for imaging. For LPS group, HSC-T6 cells were incubated with LPS (10  $\mu$ g/L) for 24 h, followed by incubation with NP-SN<sub>3</sub> or NP-N<sub>3</sub> at 37 °C for 0.5 h for imaging.

The levels of cytokine  $\alpha$ -SMA were assessed with the above cells using a commercially available  $\alpha$ -SMA kit according to the manufacturer's instruction. After lysis with RIPA Lysis buffer, HSC-T6 cells were collected and centrifuged at 12,000 g for 10 min to remove any particle. After the protein concentration was measured by the BCA protein assay kit, a protein solution at a concentration of 0.1 mg/mL was added to a 96-well plate pre-coated with mouse affinity-purified polyclonal antibodies against  $\alpha$ -SMA cytokines. The cytokine level in each sample was calculated from the standard curve according to the kit operation instruction.

## **1.7. Toxicity**

### **1.7.1. Developmental Toxicity in Zebrafish**

We selected a certain number of normal zebrafish embryos and divided the embryos into 3 groups: blank group, solvent group and experimental group. It consisted of 100 embryos in each group, and each group consisted of 3 parallel groups. The experimental group were added with different concentrations (1, 5, 10, 20  $\mu$ M) of NP-N<sub>3</sub> or NP-SN<sub>3</sub>. DMSO (10  $\mu$ L) was added to the solvent group. All the treated zebrafish embryos were stored in sterile 96-well plates containing 200  $\mu$ L of solution per well, covered with sealing film. The numbers of dead zebrafish embryos were recorded separately after 24 h and the numbers of hatching zebrafish embryos were recorded separately after 48 h in each group. Ten zebrafish larvae were randomly selected in each group after 72 h to observe under a microscope. The number of malforms was recorded.

### **1.7.2. Continuous Administration Toxicity**

WISTAR rats (GLP laboratory of the Laboratory Animal Center of Lanzhou University, 8 weeks old, weighing  $200 \pm 25$  g, 1 animal per cage, reared in separate cages, free to eat and drink, and experiment after 7 days of rearing) were chosen to study the toxicity of probes after continuous administration. The NP-N<sub>3</sub> or NP-SN<sub>3</sub> was dissolved in DMSO. In the experimental group, normal WISTAR rats were intraperitoneally injected with the probe at a dose of 0.01 mol/kg, and the control group was treated with the same dose of DMSO. The administration was continued for 14 days, then the liver, kidney and spleen were collected. The collected organs were immediately fixed with 4% glutaraldehyde solution, sliced, stained and observed under a microscope. Collect the urine and blood from rats for testing.

The zebrafish and rats use and handling protocol conformed to *the Guide for the Care and Use of Laboratory Animals* and was approved by the Institutional Animal Use and Care Committee (IAUCC) of the Lanzhou University.

## **2. Structure Characterizations**



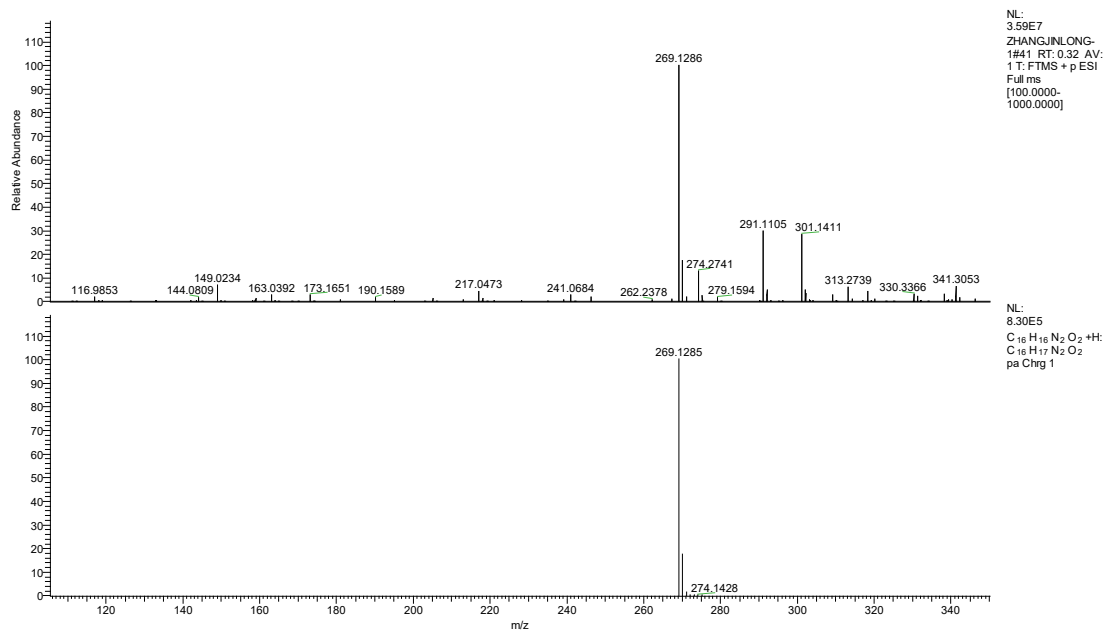

**Fig. S3** Mass spectrum of NP-NH<sub>2</sub>

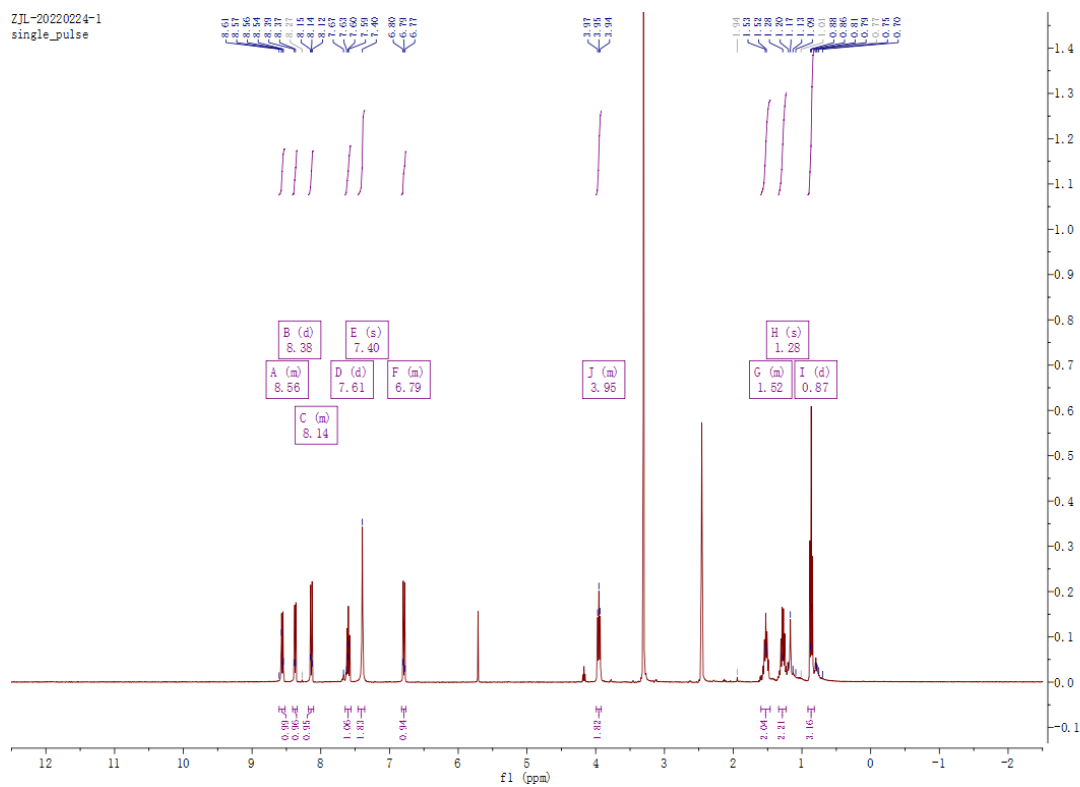

**Fig. S4** <sup>1</sup>H NMR of NP-NCS



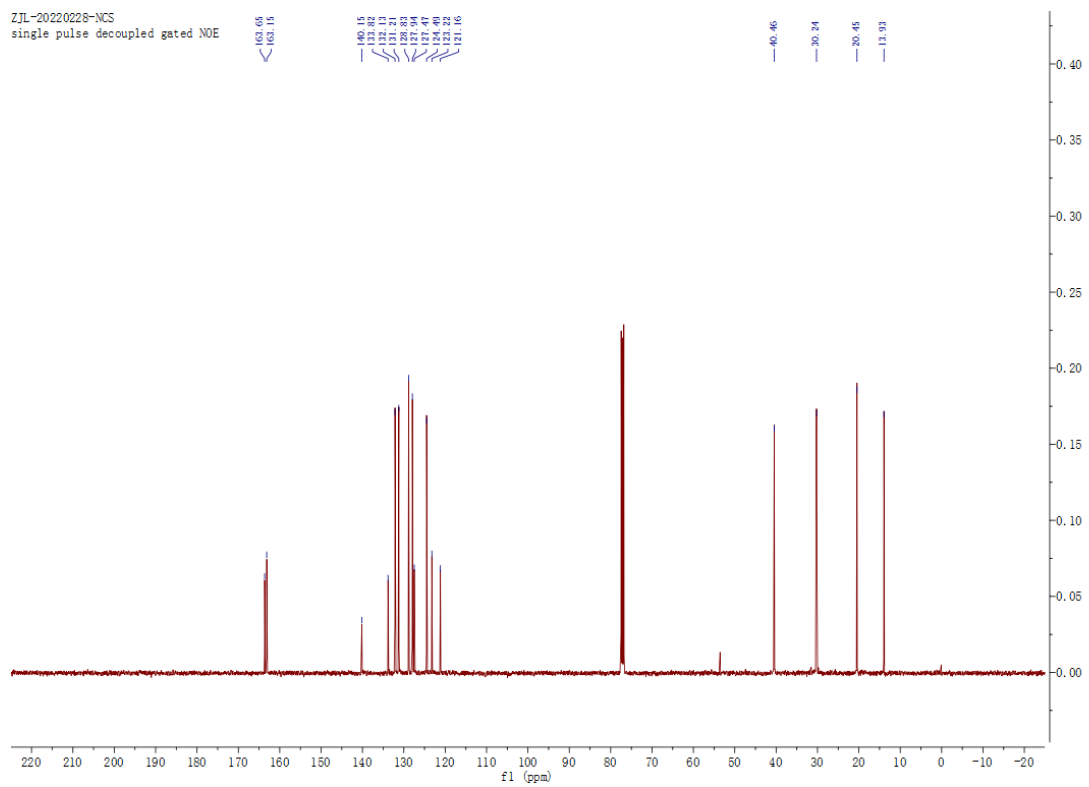

**Fig. S5** <sup>13</sup>C NMR of NP-NCS

## Generic Display Report

Analysis Info  
Analysis Name D:\Data\yangy\new\ZHANGJINLONG20220415\_1\_5\_01\_45011.d Acquisition Date 4/15/2022 12:12:59 PM  
Method POS\_100-1200\_For LC.m Operator LZU  
Sample Name ZHANGJINLONG20220415\_1 Instrument micrOTOF  
Comment

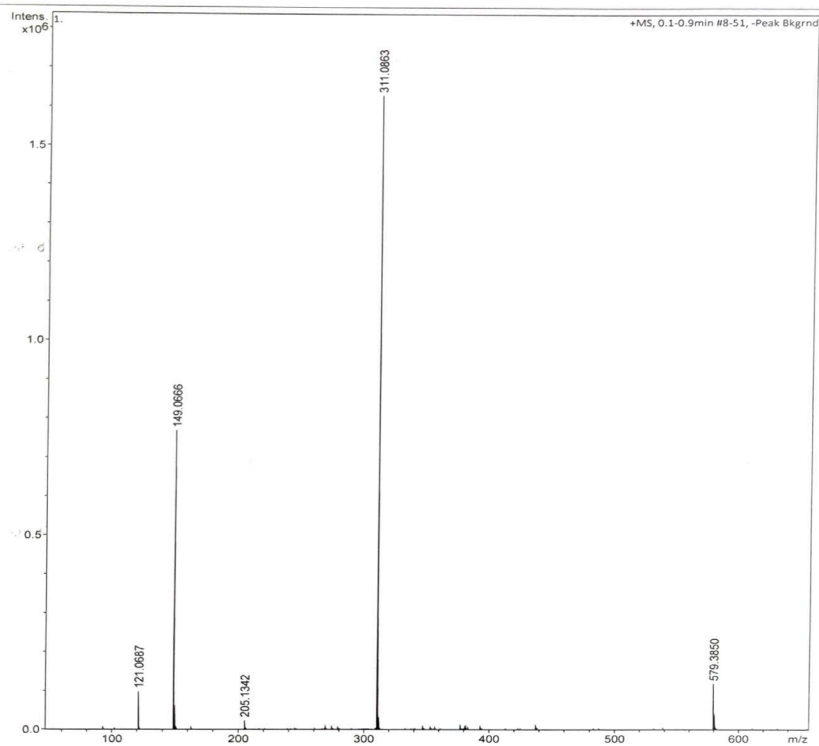

Bruker Compass DataAnalysis 4.1 printed: 4/15/2022 3:54:22 PM by: LZU Page 1 of 1

5

**Fig. S6** Mass spectrum of NP-NCS

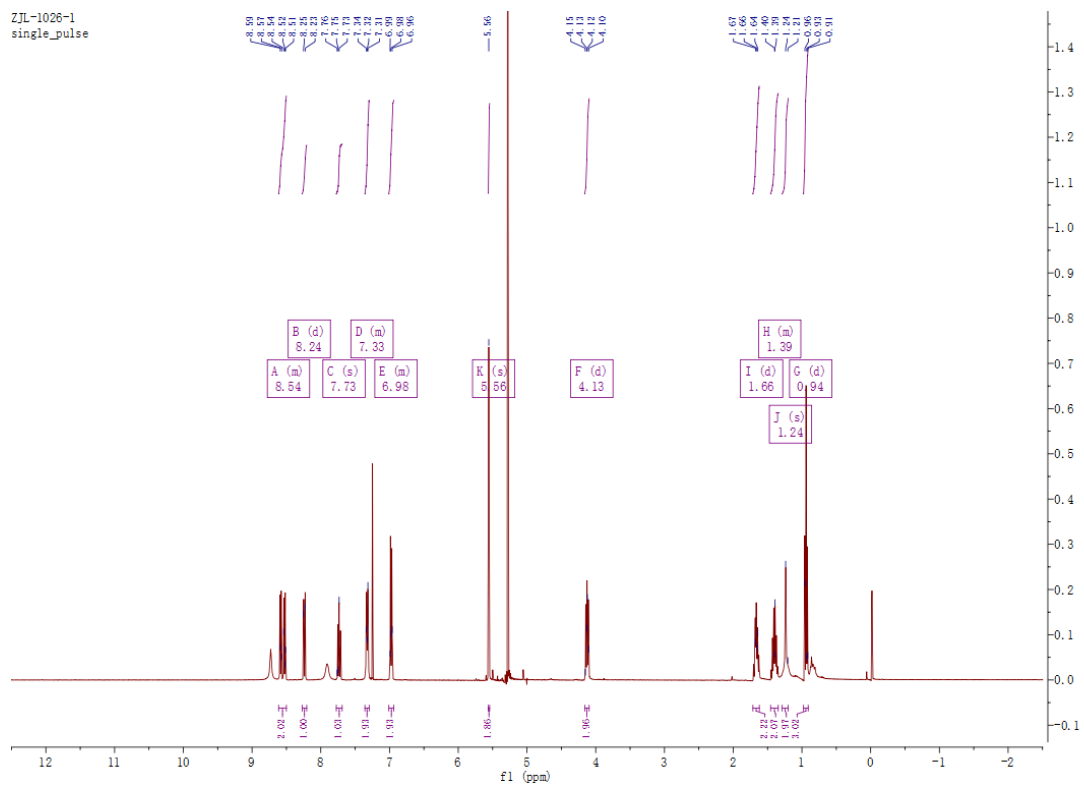

**Fig. S7**  $^1\text{H}$  NMR of NP-SN<sub>3</sub>

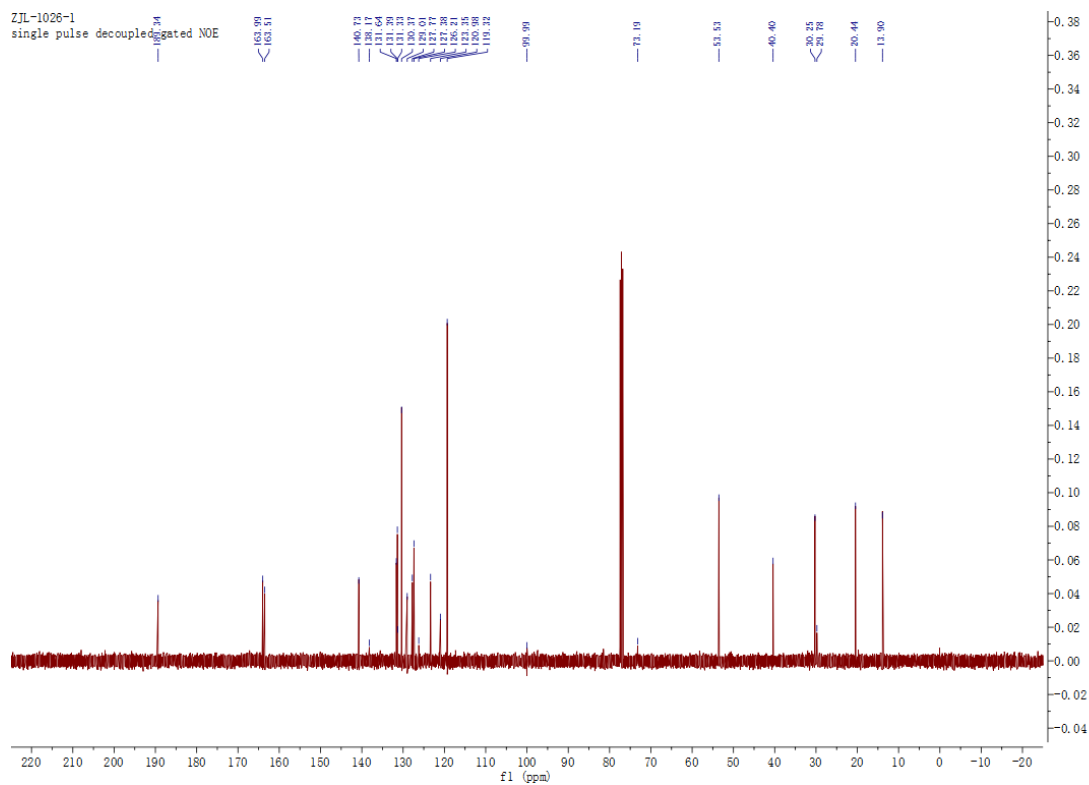

**Fig. S8**  $^{13}\text{C}$  NMR of NP-SN<sub>3</sub>

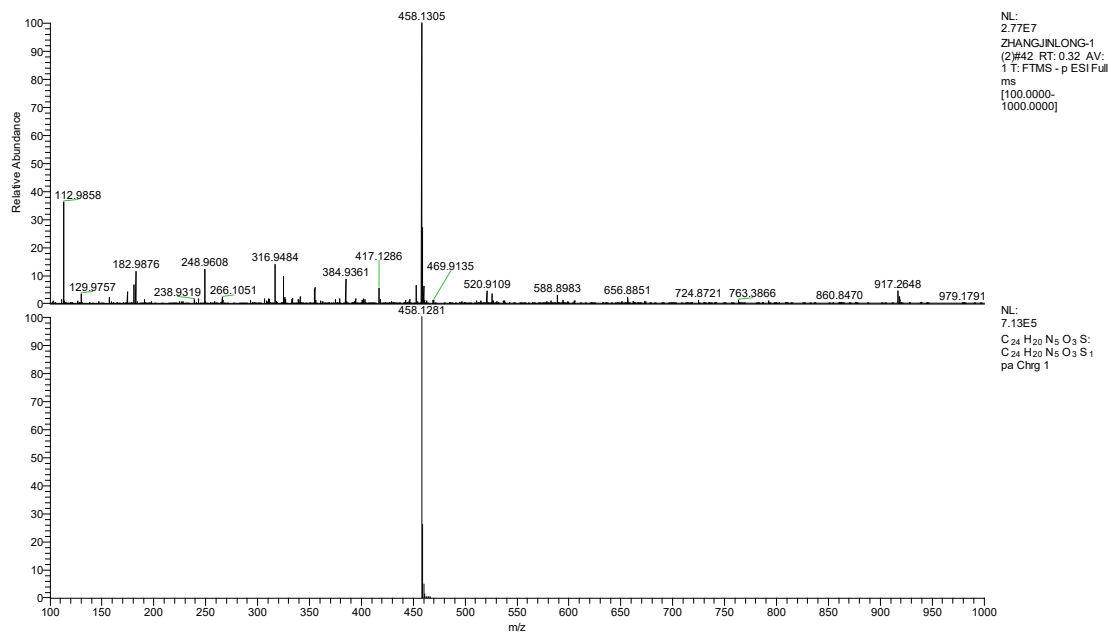

**Fig. S9** Mass spectrum of NP-SN<sub>3</sub>

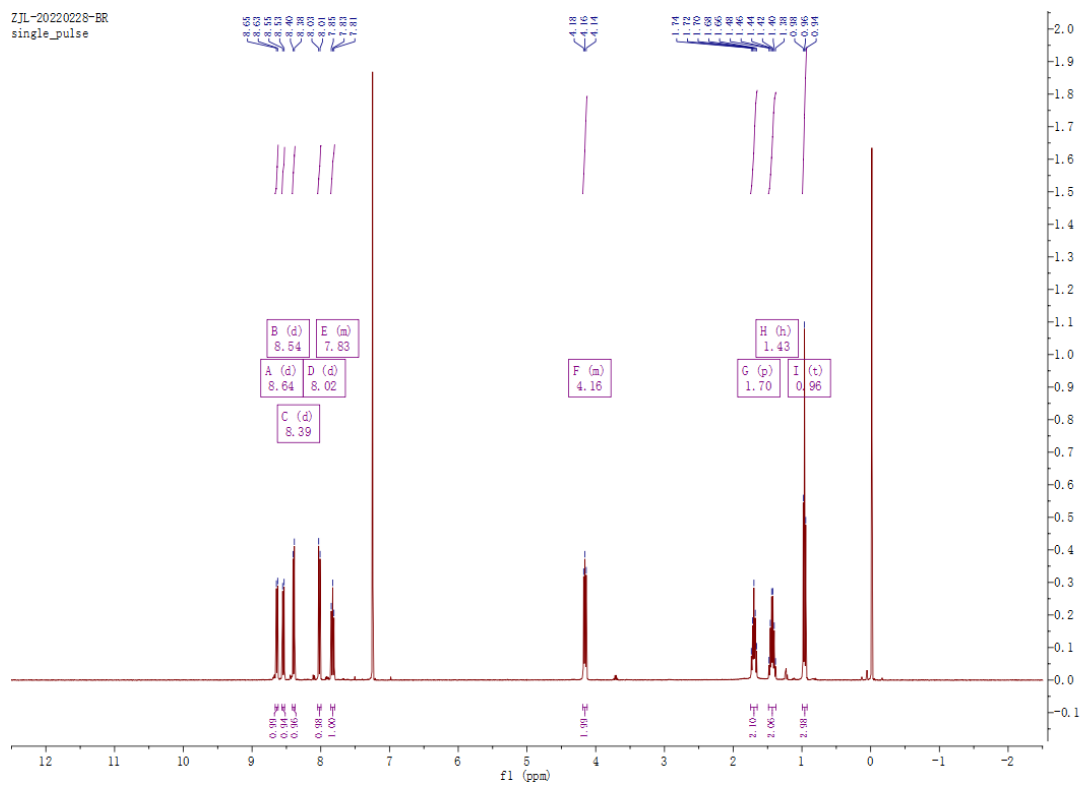

**Fig. S10** <sup>1</sup>H NMR of NP-Br

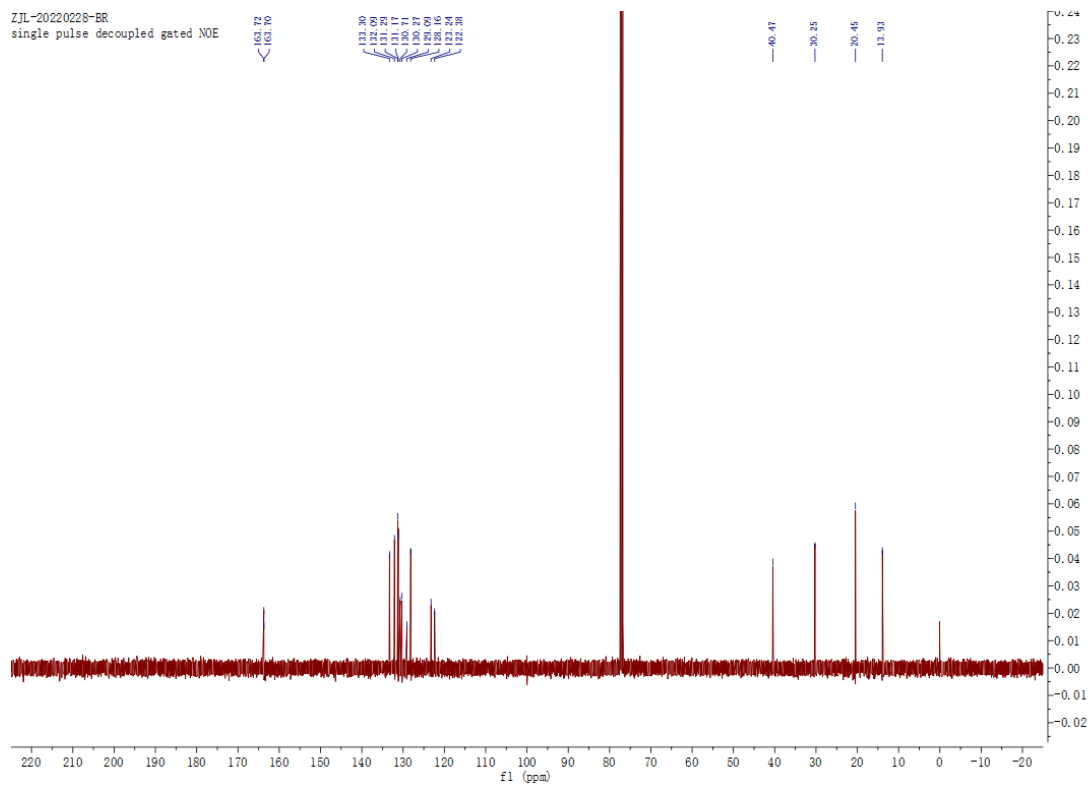

**Fig. S11**  $^{13}\text{C}$  NMR of NP-Br

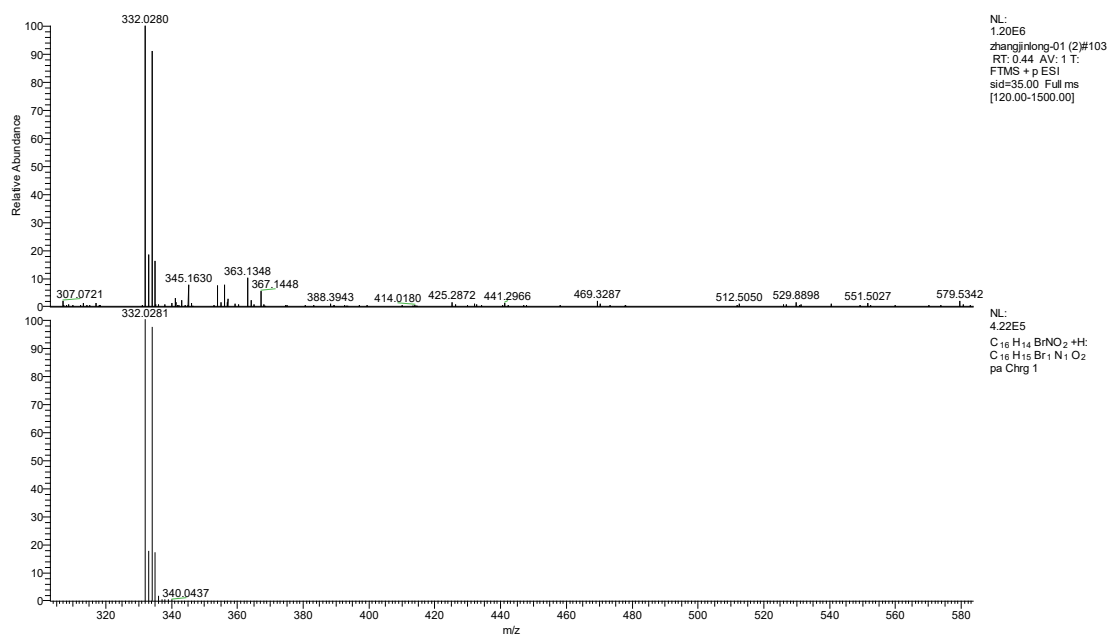

**Fig. S12** Mass spectrum of NP-Br

ZJL-20220224-3  
single\_pulse

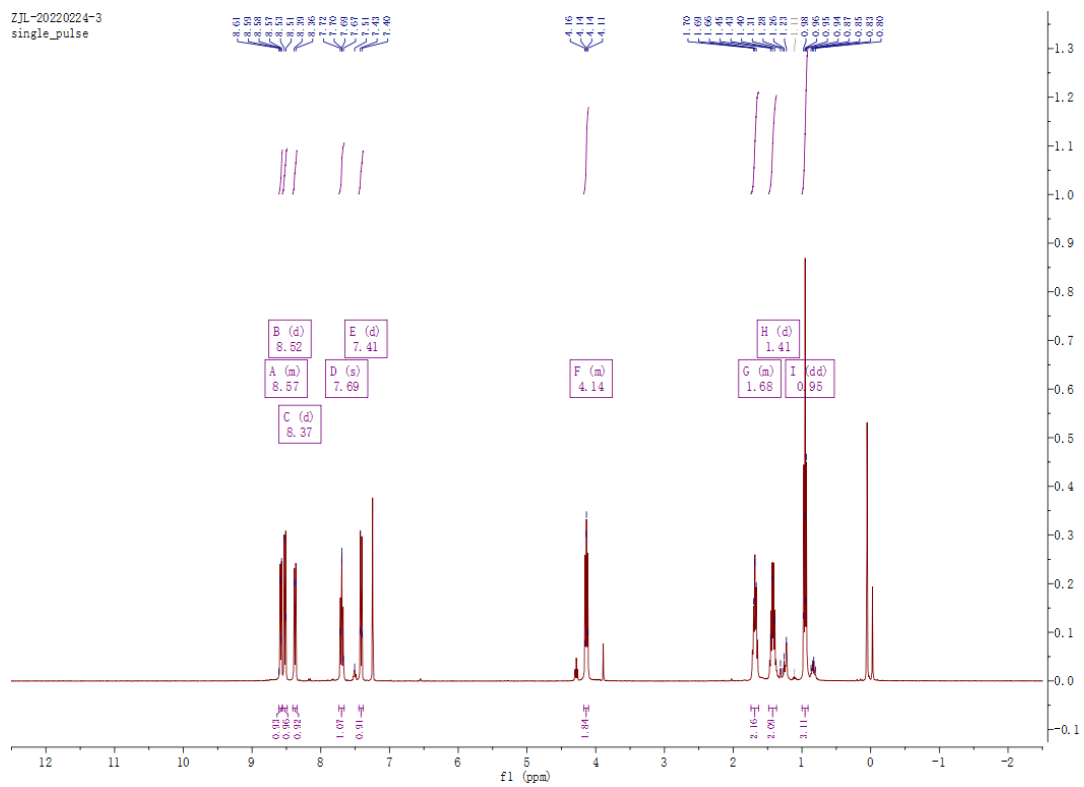

**Fig. S13**  $^1\text{H}$  NMR of NP-N<sub>3</sub>

zjl-20220228-N3  
single pulse decoupled gated NOE

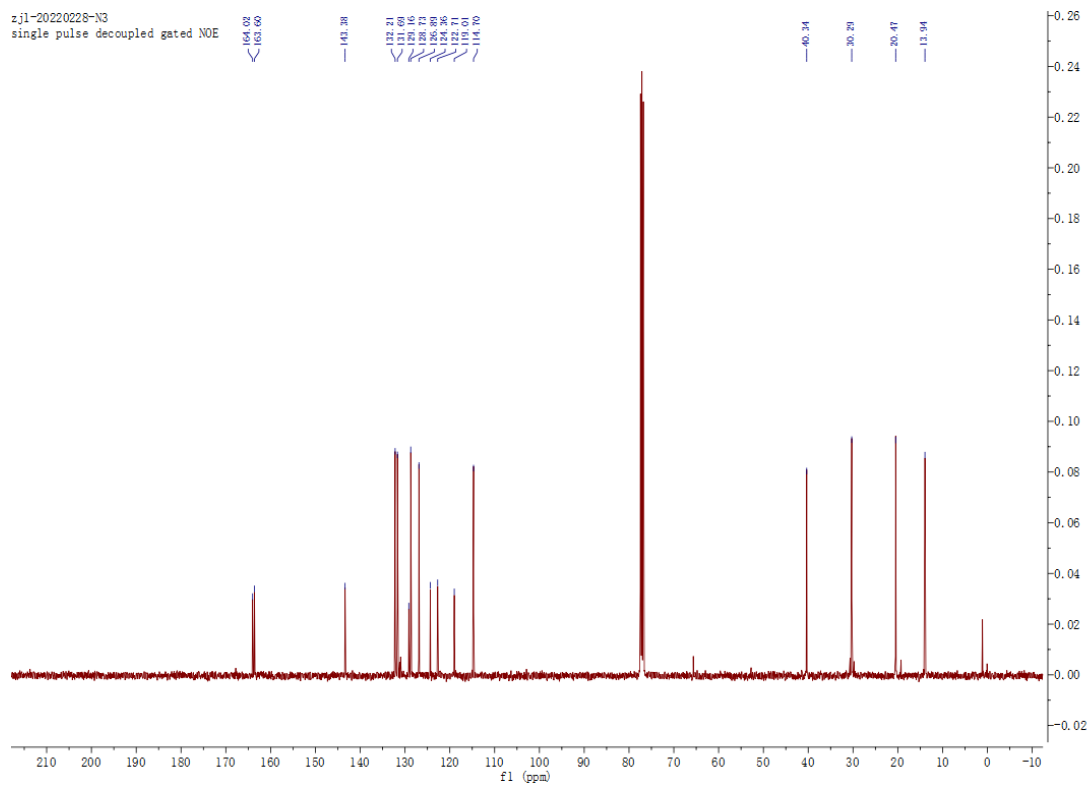

**Fig. S14**  $^{13}\text{C}$  NMR of NP-N<sub>3</sub>

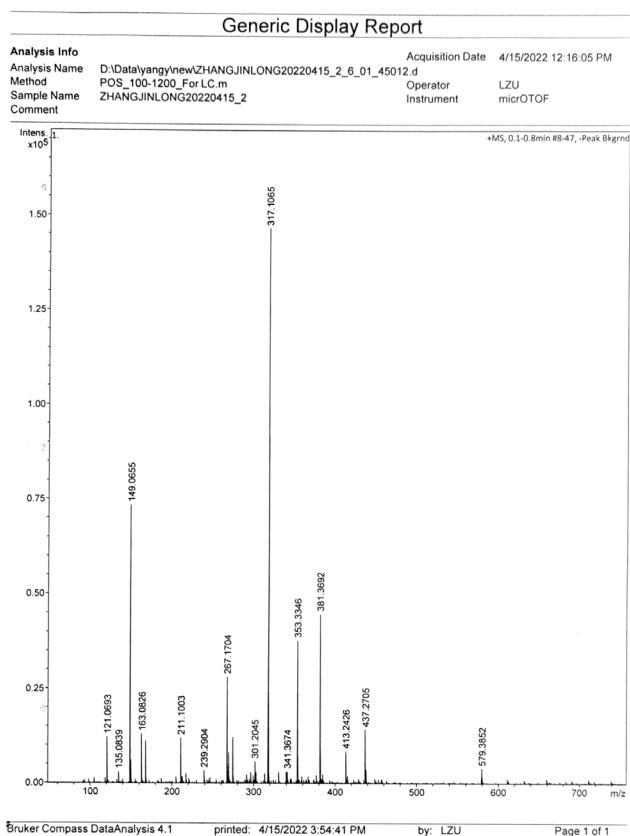

**Fig. S15** Mass spectrum of NP-N<sub>3</sub>

### 3. Spectral Supplementary Data of NP-SN<sub>3</sub> and NP-N<sub>3</sub>

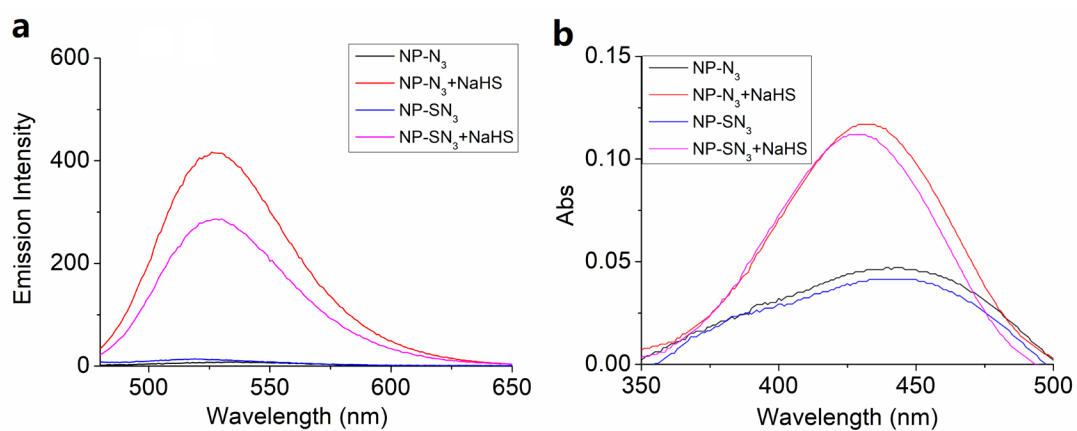

**Fig. S16** Emission changes (a) and absorption changes (b) of probes after addition of NaHS.

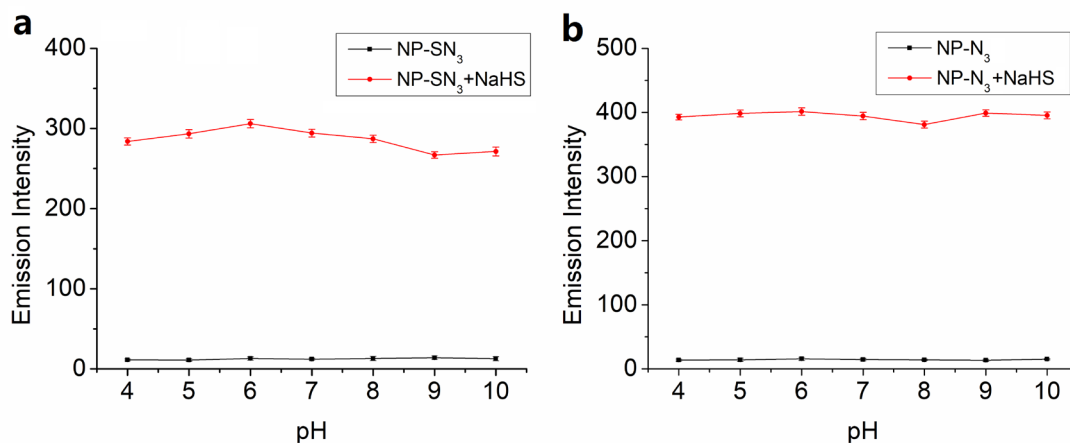

**Fig. S17** Influence of pH on the fluorescence response of NP-SN<sub>3</sub> (a) and NP-N<sub>3</sub> (b) at 520 nm in the presence and absence of NaHS.  $\lambda_{ex} = 450$  nm

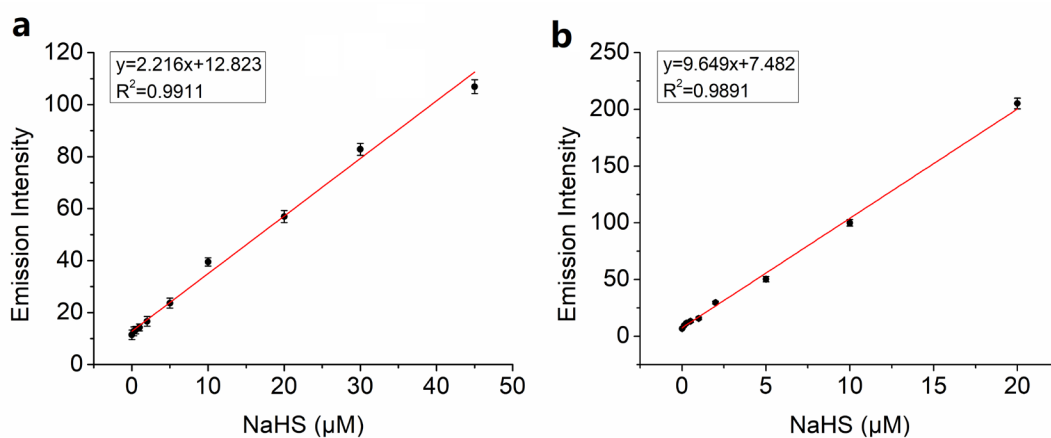

**Fig. S18** Linear relationship between H<sub>2</sub>S concentration and fluorescence intensity of probes NP-SN<sub>3</sub> (a) or NP-N<sub>3</sub> (b) at 520 nm.  $\lambda_{ex} = 450$  nm

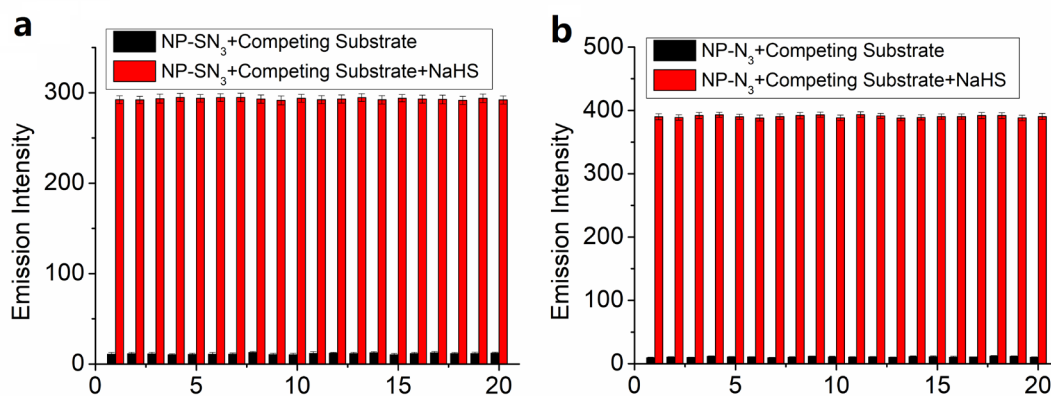

**Fig. S19** Competition experiments on NaHS with NP-SN<sub>3</sub> (a) and NP-N<sub>3</sub> (b) in the presence of various analytists at 37 °C. Analytes 1–20: blank, GSH (1 mM), Hcy, Cys, Thr, Gly, K<sup>+</sup>, Na<sup>+</sup>, Mg<sup>2+</sup>, F<sup>-</sup>, Cl<sup>-</sup>, Br<sup>-</sup>, I<sup>-</sup>, NO<sub>3</sub><sup>-</sup>, SO<sub>3</sub><sup>2-</sup>, HSO<sub>3</sub><sup>-</sup>, SO<sub>4</sub><sup>2-</sup>, AcO<sup>-</sup>, ClO<sup>-</sup>, H<sub>2</sub>O<sub>2</sub>.  $\lambda_{ex} = 450$  nm

#### 4. In Vitro, Cellular and Zebrafish Imaging Data of NP-N<sub>3</sub>



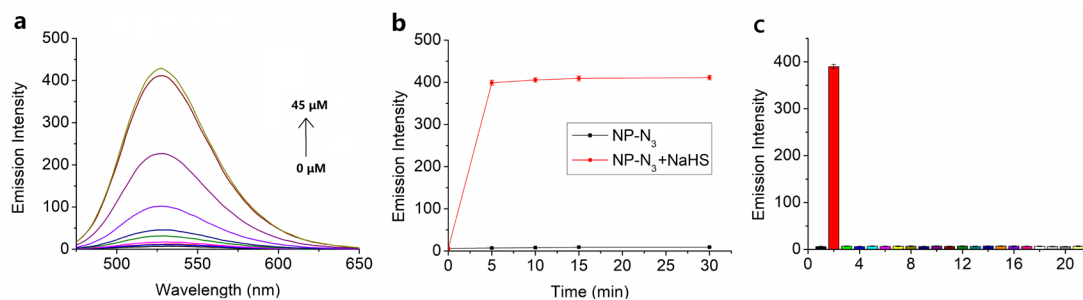

**Fig. S20** (a) Concentration-dependent fluorescence spectra of  $\text{NP-N}_3$  towards  $\text{H}_2\text{S}$  (0–45  $\mu\text{M}$ ). (b) Fluorescence intensity of  $\text{NP-N}_3$  (10  $\mu\text{M}$ ) as a function of time in the presence or absence of NaHS (100  $\mu\text{M}$ ) at 520 nm; (c) Fluorescence intensity changes of  $\text{NP-N}_3$  for various analytes (200  $\mu\text{M}$  unless stated otherwise) in PBS at 37 °C. Analytes 1–21: blank, NaHS (100  $\mu\text{M}$ ), GSH (1 mM), Hcy, Cys, Thr, Gly,  $\text{K}^+$ ,  $\text{Na}^+$ ,  $\text{Mg}^{2+}$ ,  $\text{F}^-$ ,  $\text{Cl}^-$ ,  $\text{Br}^-$ ,  $\text{I}^-$ ,  $\text{NO}_3^-$ ,  $\text{SO}_3^{2-}$ ,  $\text{HSO}_3^-$ ,  $\text{SO}_4^{2-}$ ,  $\text{AcO}^-$ ,  $\text{ClO}^-$ ,  $\text{H}_2\text{O}_2$ .  $\lambda_{\text{ex}} = 450 \text{ nm}$ .

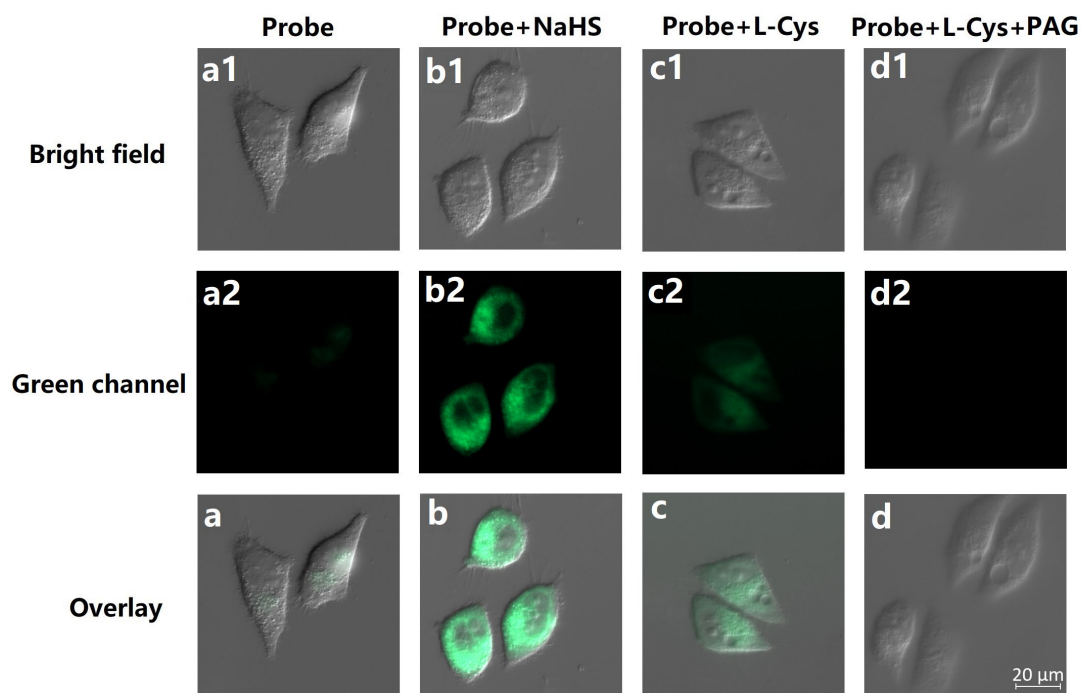

**Fig. S21** Bioimaging of exogenous and endogenously produced  $\text{H}_2\text{S}$  with  $\text{NP-SN}_3$  in HepG2 cells. (a) Cells incubated with  $\text{NP-SN}_3$ . (b) Cells incubated with NaHS (100  $\mu\text{M}$ ) for 0.5 h and then stained by  $\text{NP-SN}_3$ . (c) Cells incubated with Cys (200  $\mu\text{M}$ ) for 1 h and then by  $\text{NP-SN}_3$ . (d) Cells incubated for 1 h with 1 mM PAG and 200  $\mu\text{M}$  Cys, and then by  $\text{NP-SN}_3$ . (a1–d1) Bright field images. (a2–d2) Green channel images. (a–d) Merged images.  $\lambda_{\text{em}} = 500\text{--}550 \text{ nm}$ .

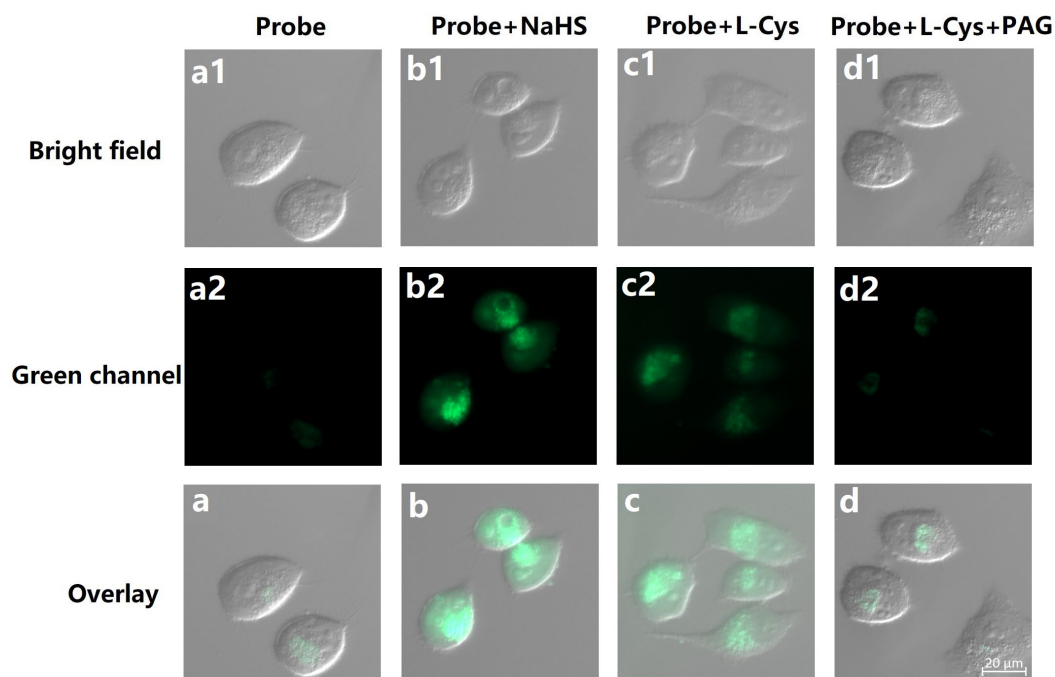

**Fig. S22** Bioimaging of exogenous and endogenously produced  $H_2S$  with  $NP-N_3$  in HepG2 cells. (a) Cells incubated with  $NP-N_3$ . (b) Cells incubated with NaHS (100  $\mu M$ ) for 0.5 h and then stained by  $NP-N_3$ . (c) Cells incubated with Cys (200  $\mu M$ ) for 1 h and then by  $NP-N_3$ . (d) Cells incubated for 1 h with 1 mM PAG and 200  $\mu M$  Cys, and then by  $NP-N_3$ . (a1–d1) Bright field images. (a2–d2) Green channel images. (a–d) Merged images.  $\lambda_{em} = 500-550$  nm.

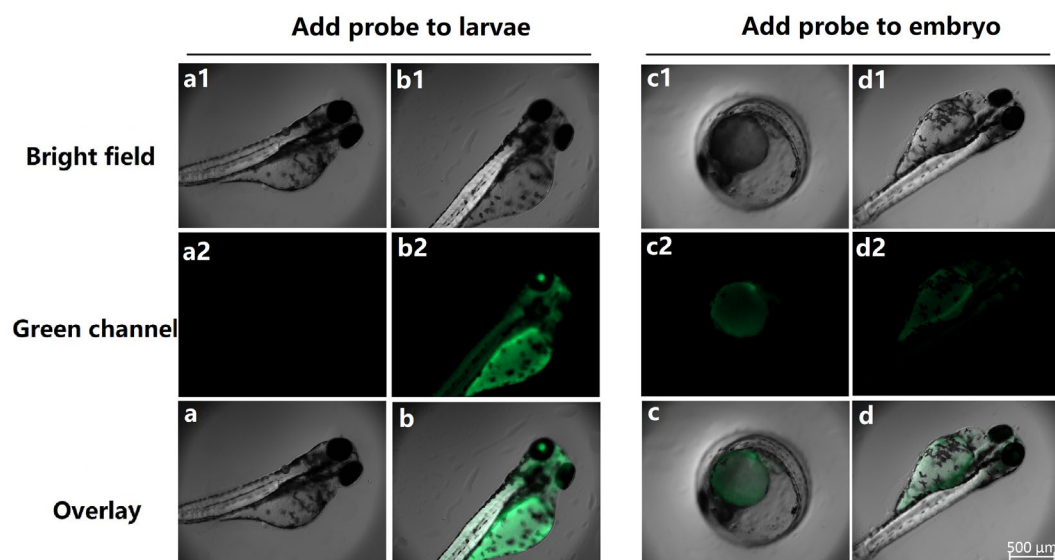

**Fig. S23** Bioimaging of exogenous and endogenously produced  $H_2S$  with  $NP-N_3$  in zebrafish. (a) Zebrafish larvae incubated with  $NP-N_3$  for 0.5 h; (b) Zebrafish larvae were incubated with NaHS (100  $\mu M$ ) for 0.5 h and then stained with  $NP-N_3$ . Imaging of zebrafish embryo (c) and zebrafish larvae (d) after adding  $NP-N_3$  during zebrafish

embryonic growth. (a1–d1) Brightfield image. (a2–d2) Green channel image. (a–d) Merged images.  $\lambda_{em} = 500-550$  nm.

## 5. Detection of H<sub>2</sub>S Released by Probes in Vitro, Cells and Zebrafish

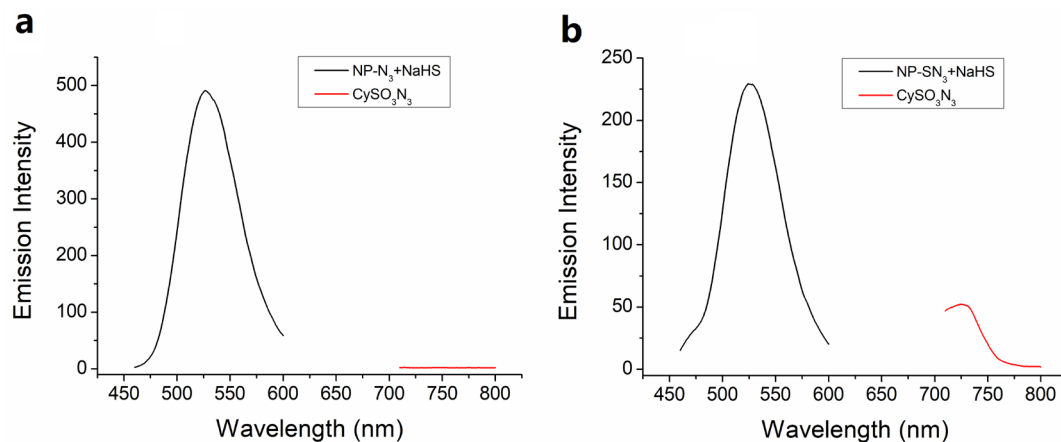

**Fig. S24** Fluorescence intensities of NP-N<sub>3</sub> (a) and NP-SN<sub>3</sub> (b) with CySO<sub>3</sub>N<sub>3</sub> added after NaHS addition.  $\lambda_{em}=450$  nm and 675 nm. slit width: 3,3 and 10,5.

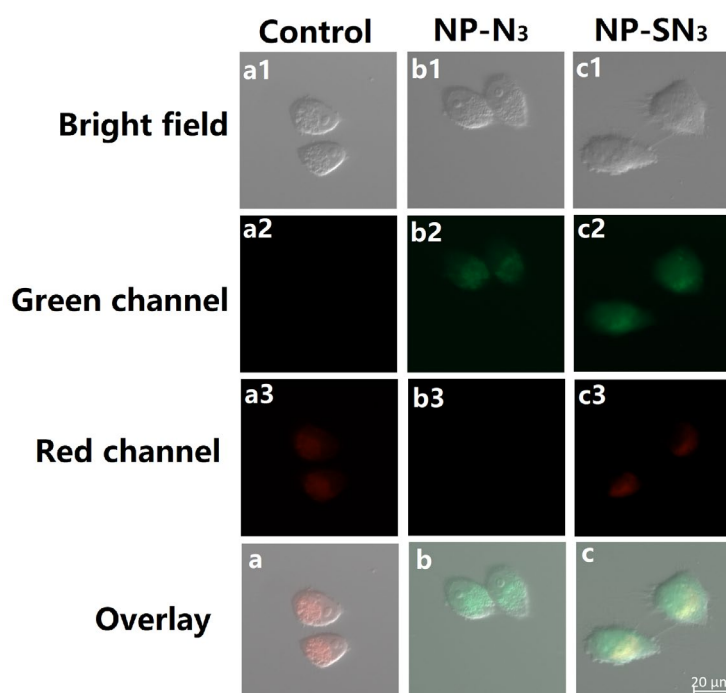

**Fig. S25** Bioimaging of HePG2 cells with CySO<sub>3</sub>N<sub>3</sub> added 1 h after adding probes. (a) Cells were incubated CySO<sub>3</sub>N<sub>3</sub>. (b) Cells were incubated with NP-N<sub>3</sub> for 1 h before adding CySO<sub>3</sub>N<sub>3</sub>. (c) Cells were incubated with NP-SN<sub>3</sub> for 1 h before adding CySO<sub>3</sub>N<sub>3</sub>. (a1–c1) Bright field images. (a2–c2) Green channel images. (a3–c3) Red channel images. (a–c) Merged images.  $\lambda_{em}=500-550$  nm and 650-710 nm.

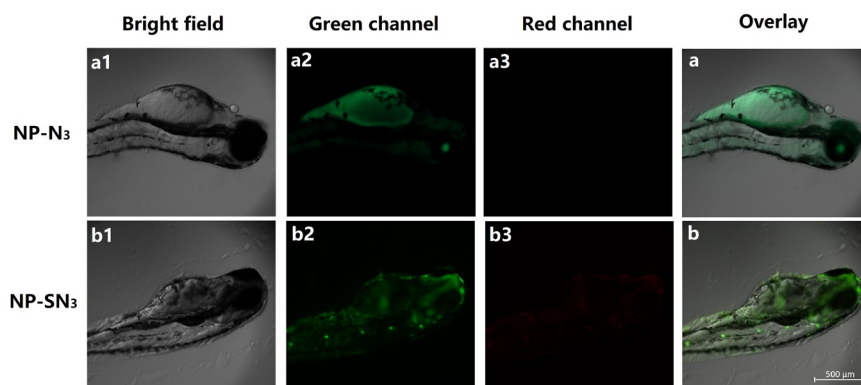

**Fig. S26** Bioimaging of zebrafish with  $\text{CySO}_3\text{N}_3$  added 1 h after adding probes. (a) Zebrafish larvae were incubated with  $\text{NP-N}_3$  for 1 h before adding  $\text{CySO}_3\text{N}_3$ . (b) Zebrafish larvae were incubated with  $\text{NP-SN}_3$  for 1 h before adding  $\text{CySO}_3\text{N}_3$ . (a1–b1) Bright field images. (a2–b2) Green channel images. (a3–b3) Red channel images. (a–b) Merged images.  $\lambda_{\text{em}}=500\text{-}550\text{ nm}$  and  $650\text{-}710\text{ nm}$ .

## 6. Cytotoxicity Assay

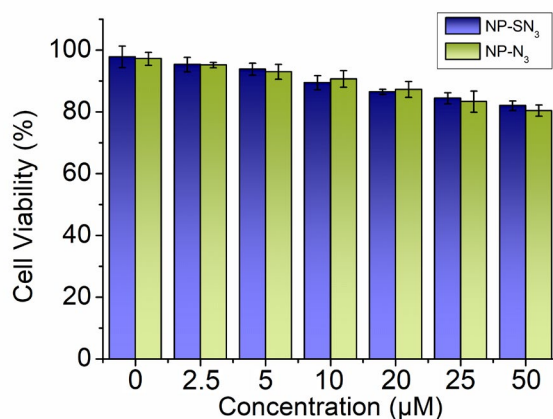

**Fig. S27** Viability of HepG2 cell in the presence of different concentrations of  $\text{NP-SN}_3$  and  $\text{NP-N}_3$ .

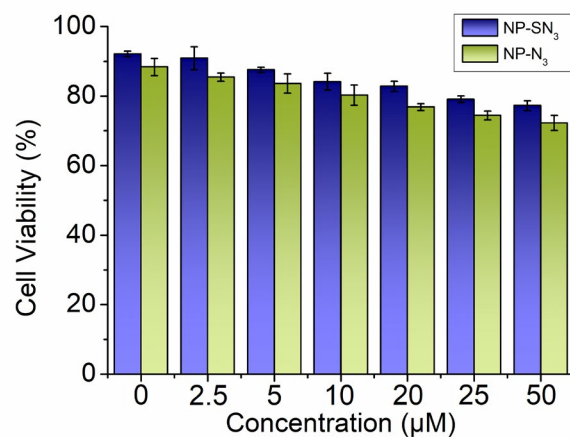

**Fig. S28** Viability of HTS-T6 cell in the presence of different concentrations of NP-SN<sub>3</sub> and NP-N<sub>3</sub>.

## 7. Quantitative Standard Curve

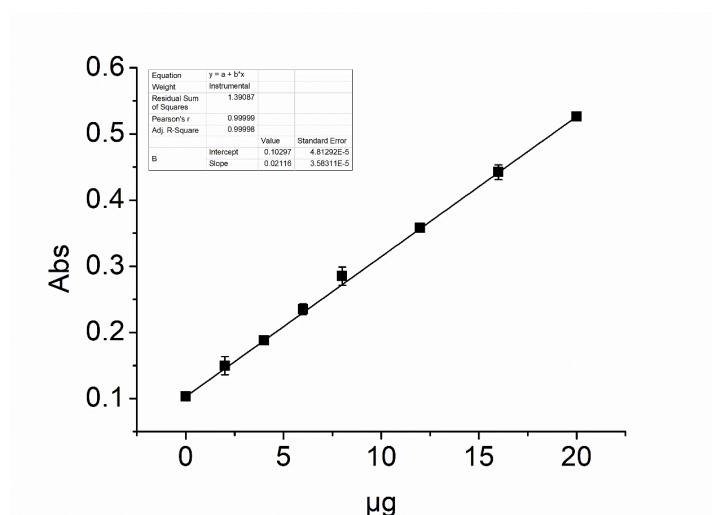

**Fig. S29** BCA protein quantitative standard curve

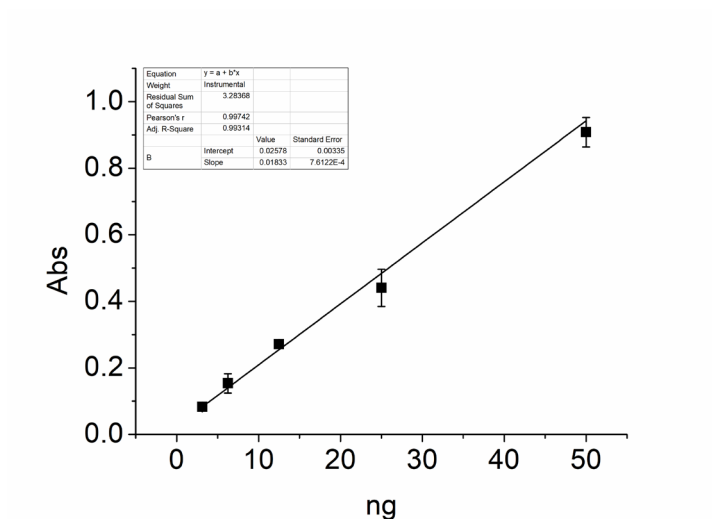

**Fig. S30** α-SMA quantitative standard curve

## 8. Comparison with the Existing H<sub>2</sub>S Sensor

**Table S1** Comparison with the existing H<sub>2</sub>S sensor

| Probe for H <sub>2</sub> S                                                          | Test system(v/v)           | $\lambda_{ex}/\lambda_{em}$ | Response time | LOD    | Toxicity evaluation                                                                                                    | Ref       |
|-------------------------------------------------------------------------------------|----------------------------|-----------------------------|---------------|--------|------------------------------------------------------------------------------------------------------------------------|-----------|
| 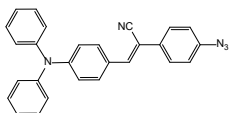   | PBS:DMF=7:3                | 420/590 nm                  | 5 min         | 520 nM | cytotoxicity                                                                                                           | 14        |
|    | PBS:CH <sub>3</sub> CN=1:1 | 620/700 nm                  | 30 min        | 46 nM  | cytotoxicity                                                                                                           | 15        |
|    | PBS:CH <sub>3</sub> CN=1:1 | 450/650 nm                  | 30 min        | 25 nM  | cytotoxicity                                                                                                           | 16        |
|    | PBS                        | 335/533 nm                  | 3.4 min       | 46 nM  | cytotoxicity                                                                                                           | 17        |
|   | PBS                        | 675/695 nm                  | 30 min        | 38 nM  | cytotoxicity                                                                                                           | 30        |
|  | PBS:DMSO=1:4               | 450/520 nm                  | 60 min        | 97 nM  | 1) cytotoxicity<br>2) continuous administration toxicity<br>3) developmental toxicity<br>4) detection-induced toxicity | This work |

## 9. The examinations of blood and urine routine in rats

**Table S2** The changes of blood routine examinations in rats after continuous injection of probes

| Test items                            | Control | NP-N <sub>3</sub> | NP-SN <sub>3</sub> |
|---------------------------------------|---------|-------------------|--------------------|
| Leukocyte (10 <sup>9</sup> /L)        | 5.23    | 1.65*             | 4.71               |
| Red blood cells (10 <sup>12</sup> /L) | 6.61    | 6.79              | 6.37               |
| Hemoglobin (g/L)                      | 173     | 146               | 151                |
| Platelets (10 <sup>9</sup> /L)        | 791     | 245*              | 518                |
| Neutrophils (%)                       | 40.9    | 45.6              | 44.5               |
| Lymphocytes (%)                       | 57.5    | 56.4              | 51.5               |

\* $p < 0.05$

**Table S3** The changes of urine routine examinations in rats after continuous injection of

probes

| Test items                | Control  | NP-N <sub>3</sub> | NP-SN <sub>3</sub> |
|---------------------------|----------|-------------------|--------------------|
| pH                        | 7.3      | 7.3               | 7.3                |
| proportion                | 1.020    | 1.020             | 1.020              |
| protein(g/L)              | 2.8      | 2.9               | 2.9                |
| glucose                   | 0        | 0                 | 0                  |
| ketone bodies (mmol/L)    | 2.4      | 1.6               | 1.9                |
| Bilirubin                 | Negative | Negative          | Negative           |
| Urobilinogen              | Negative | Negative          | Negative           |
| Urinary white blood cells | Negative | Negative          | Negative           |
| VC                        | Negative | Negative          | Negative           |
